# Supplementary material for: Aluminium-rich Beta zeolite-supported platinum nanoparticles for the low-temperature catalytic removal of toluene
Source: Royal Society of Chemistry journal article supplement (doi:10.1039/c4ta06407k), 2015-01-01
Supplement: c4ta06407k1.pdf [file c4ta06407k1.pdf]

## **Electronic Supplementary Information (ESI)**

### **Aluminum-rich Beta zeolite supported platinum nanoparticles for low-temperature catalytic removal of toluene**

**Chunyu Chen, Qinming Wu, Fang Chen, Ling Zhang, Shuxiang Pan, Chaoqun Bian, Xiaoming Zheng, Xiangju Meng\* and Feng-Shou Xiao**

*Key Lab of Applied Chemistry of Zhejiang Province and Department of Chemistry, Zhejiang University, Hangzhou 310007, China.*

*E-mail: mengxj@zju.edu.cn*

**Table S1** Textural parameters of the as-synthesized Beta-SDS and Beta-TEA.

| Sample   | BET surface area<br>(m <sup>2</sup> /g) <sup>a</sup> | Micropore volume<br>(cm <sup>3</sup> /g) <sup>a</sup> | Mesopore volume<br>(cm <sup>3</sup> /g) <sup>a</sup> |
|----------|------------------------------------------------------|-------------------------------------------------------|------------------------------------------------------|
| Beta-SDS | 434                                                  | 0.19                                                  | 0.02                                                 |
| Beta-TEA | 143                                                  | 0.01                                                  | 0.16                                                 |

<sup>a</sup> Determined from N<sub>2</sub> sorption isotherms.

**Table S2** Textural parameters of the various samples.

| Sample                 | BET surface area<br>(m <sup>2</sup> /g) <sup>a</sup> | Micropore volume<br>(cm <sup>3</sup> /g) <sup>a</sup> | Mesopore volume<br>(cm <sup>3</sup> /g) <sup>a</sup> |
|------------------------|------------------------------------------------------|-------------------------------------------------------|------------------------------------------------------|
| KBeta-SDS              | 309                                                  | 0.13                                                  | 0.02                                                 |
| Pt/KBeta-SDS           | 299                                                  | 0.13                                                  | 0.03                                                 |
| Pt/KBeta-SDS-unreduced | 277                                                  | 0.12                                                  | 0.04                                                 |
| KBeta-TEA              | 496                                                  | 0.15                                                  | 0.20                                                 |
| Pt/KBeta-TEA           | 470                                                  | 0.15                                                  | 0.18                                                 |
| Pt/KBeta-TEA-unreduced | 429                                                  | 0.14                                                  | 0.17                                                 |

<sup>a</sup> Determined from N<sub>2</sub> sorption isotherms.

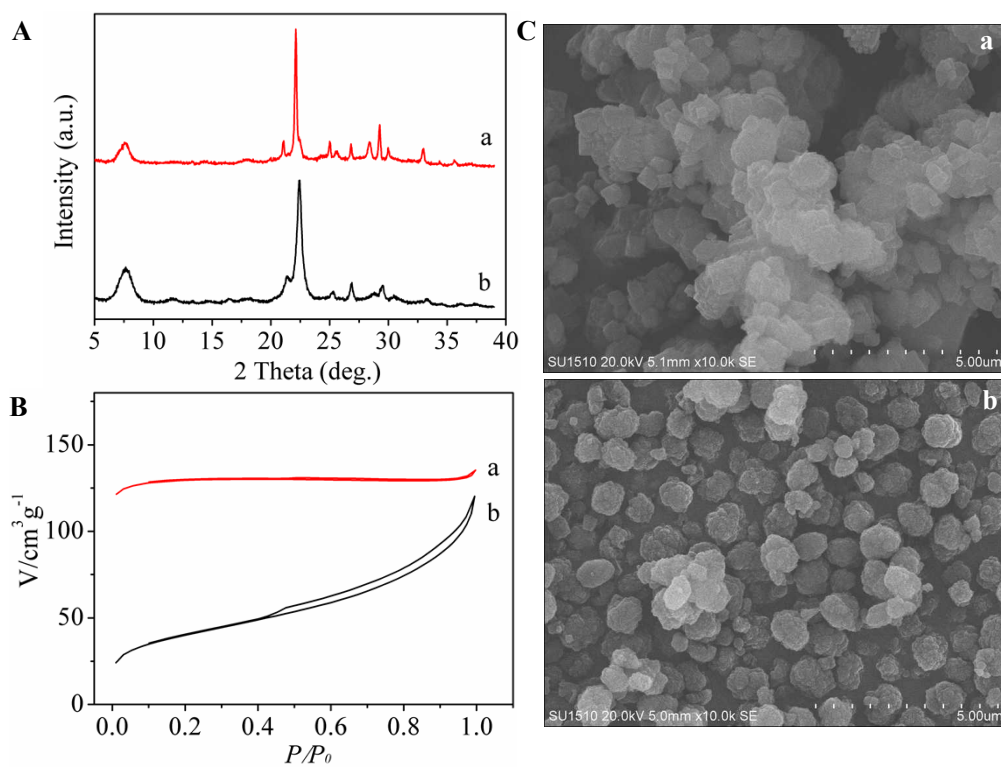

**Fig. S1** (A) XRD patterns, (B) N<sub>2</sub> sorption isotherms, and (C) SEM images of the as-synthesized (a) Beta-SDS and (b) Beta-TEA.

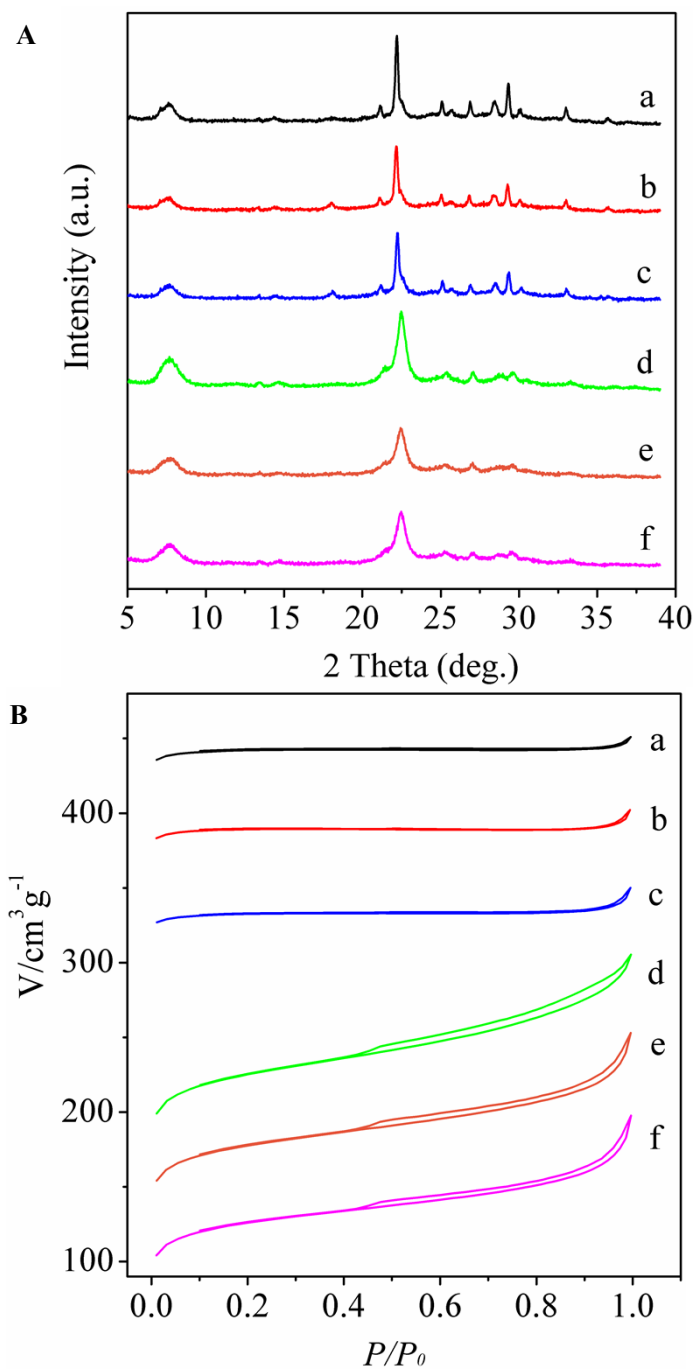

**Fig. S2** (A) XRD patterns and (B) N<sub>2</sub> sorption isotherms of the (a) KBeta-SDS, (b) Pt/KBeta-SDS, (c) Pt/KBeta-SDS-unreduced, (d) KBeta-TEA, (e) Pt/KBeta-TEA, and (f) Pt/KBeta-TEA-unreduced. The isotherms (a), (b), (c), (d), and (e) in Fig. S2B have been off-set by 350, 300, 250, 80, and 40 cm<sup>3</sup>/g at the beginning for clarity, respectively.

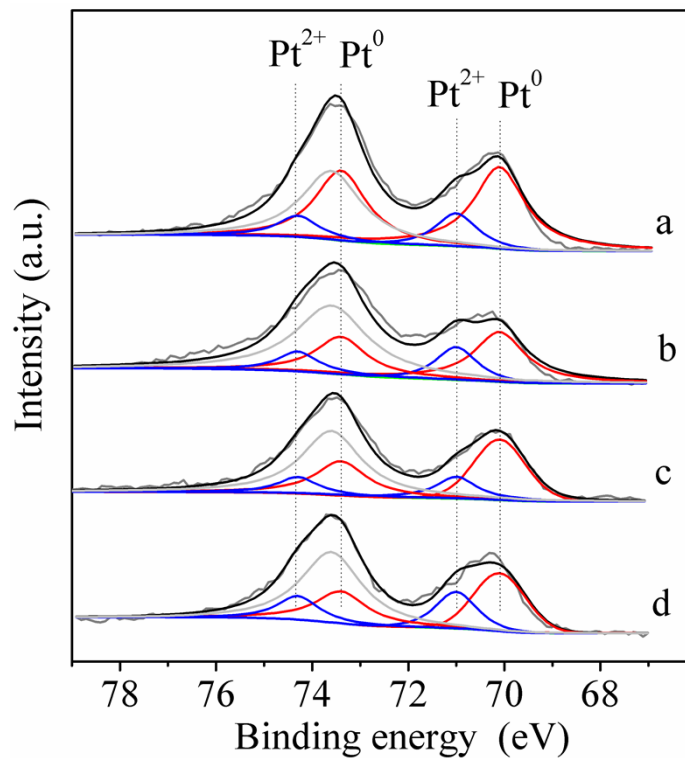

**Fig. S3** Pt4f XPS spectra of the (a) Pt/KBeta-SDS, (b) Pt/KBeta-SDS-unreduced, (c) Pt/KBeta-TEA, and (d) Pt/KBeta-TEA-unreduced.

Since Al2p peak strongly overlaps with Pt4f peak in the range of 79-67 eV, it is necessary to separate Al2p peak from the spectra. In our case, Al2p is used as 73.9 eV, the Pt4f<sub>7/2</sub> spectra could be deconvoluted into two peaks at 70.1 together with 71.0 eV, and the Pt4f<sub>5/2</sub> spectra could be also deconvoluted into two peaks at 73.4 together with 74.3 eV associated with metallic Pt<sup>0</sup> and oxidic Pt<sup>2+</sup>.<sup>1-3</sup>

### Supplementary references

- 1 C. Y. Chen, X. Wang, J. Zhang, S. X. Pan, C. Q. Bian, L. Wang, F. Chen, X. J. Meng, X. M. Zheng, X. H. Gao and F.-S. Xiao, *Catal. Lett.*, 2014, **144**, 1851.
- 2 C. Y. Chen, J. Zhu, F. Chen, X. J. Meng, X. M. Zheng, X. H. Gao and F.-S. Xiao, *Appl. Catal. B*, 2013, **140**, 199.
- 3 L. Xu, X.-C. Xu, L. K. Ouyang, X.-J. Yang, W. Mao, J. J. Su and Y.-F. Han, *J. Catal.*, 2012, **287**, 114.
